# Supplementary material for: RAD50 Loss of Function Variants in the Zinc Hook Domain Associated with Higher Risk of Familial Esophageal Squamous Cell Carcinoma
Source: MDPI journal article supplement (doi:10.3390/cancers13184715), 2021-09-21
Supplement: s1 [file s1]

Table S1: Deleterious missense *RAD50* variants with CADD score  $\geq 25$

| Chr5<br>(hg19) | Mutation<br>(DNA) <sup>a</sup> | CADD<br>1.4 | Exon | Protein<br>change | FH+ cases<br>(n=2088)         | Sporadic<br>cases<br>(n=2148) | Controls<br>(n=2342)          | gnomAD <sup>b</sup>            |                                |                                |
|----------------|--------------------------------|-------------|------|-------------------|-------------------------------|-------------------------------|-------------------------------|--------------------------------|--------------------------------|--------------------------------|
|                |                                |             |      |                   |                               |                               |                               | East Asian<br>(n=19954)        | European<br>(n=129034)         | All<br>(n=282716)              |
| 131911608      | c.T353C                        | 27.7        | 3    | p.I118T           | 0                             | 0                             | 2<br>( $8.5 \times 10^{-4}$ ) | 17<br>( $9.3 \times 10^{-4}$ ) | 0                              | 17<br>( $6.0 \times 10^{-5}$ ) |
| 131931472      | c.G2177A                       | 25.8        | 13   | p.R726H           | 1<br>( $4.8 \times 10^{-4}$ ) | 0                             | 0                             | 0                              | 15<br>( $1.2 \times 10^{-4}$ ) | 30<br>( $1.1 \times 10^{-4}$ ) |
| 131939071      | c.C2287T                       | 25.2        | 14   | p.R763C           | 1<br>( $4.8 \times 10^{-4}$ ) | 0                             | 0                             | 0                              | 1<br>( $8.8 \times 10^{-6}$ )  | 2<br>( $7.0 \times 10^{-6}$ )  |
| 131976391      | c.G3646T                       | 32          | 24   | p.A1216S          | 0                             | 1<br>( $4.7 \times 10^{-4}$ ) | 0                             | Not<br>reported                | Not<br>Reported                | Not<br>Reported                |
| 131976461      | c.G3716A                       | 34          | 24   | p.R1239Q          | 1<br>( $4.8 \times 10^{-4}$ ) | 0                             | 0                             | 1<br>( $5.4 \times 10^{-5}$ )  | 0                              | 7<br>( $2.5 \times 10^{-5}$ )  |
| 131977907      | c.C3790T                       | 30          | 25   | p.L1264F          | 4<br>( $1.9 \times 10^{-3}$ ) | 4<br>( $1.9 \times 10^{-3}$ ) | 3<br>( $1.3 \times 10^{-3}$ ) | 80<br>( $4.0 \times 10^{-3}$ ) | 0                              | 81<br>( $2.9 \times 10^{-4}$ ) |

n is the number of alleles.

Table S2: The IC<sub>50</sub> of various genotoxic compounds in U2OS overexpressing vector alone (VA), *RAD50*<sup>WT</sup>, *RAD50*<sup>Q672X</sup> and *RAD50*<sup>L1264F</sup>.

|                         | IC <sub>50</sub>           |                            |                            |                             |
|-------------------------|----------------------------|----------------------------|----------------------------|-----------------------------|
|                         | VA                         | WT                         | L1264F                     | Q672X                       |
| <b>Cisplatin (nM)</b>   | <b>125.6</b> (117.0-134.8) | <b>115.4</b> (108.9-122.4) | <b>116.2</b> (105.2-130.5) | <b>115.5</b> (106.5-125.4)  |
| <b>Olaparib(nM)</b>     | <b>100.2</b> (98.1-103.6)  | <b>105.2</b> (103.2-108.6) | <b>103.8</b> (99.8-107.9)  | <b>100.1</b> (95.2-104.7)   |
| <b>AZD7762 (nM)</b>     | <b>64.53</b> (55.47-75.07) | <b>66.49</b> (51.86-85.26) | <b>40.72</b> (37.8-44.2)   | <b>28.91</b> (26.01-32.13)  |
| <b>Formaldehyde(uM)</b> | <b>107.6</b> (105.1-110.2) | <b>113.1</b> (103.0-124.2) | <b>80.12</b> (73.47-87.37) | <b>76.47</b> (68.03- 85.96) |
