# Supplementary material for: RAD50 Loss of Function Variants in the Zinc Hook Domain Associated with Higher Risk of Familial Esophageal Squamous Cell Carcinoma
Source: MDPI journal article supplement (doi:10.3390/cancers13184715), 2021-09-21
Supplement: s1 [file s1]

Figure S1a.

RAD50

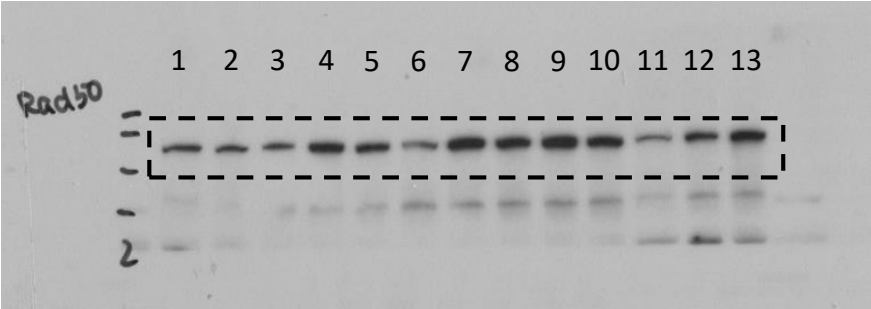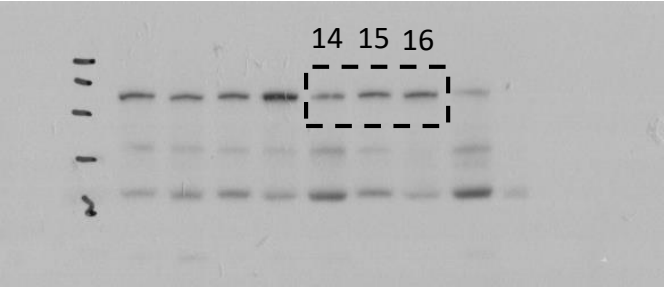

P84

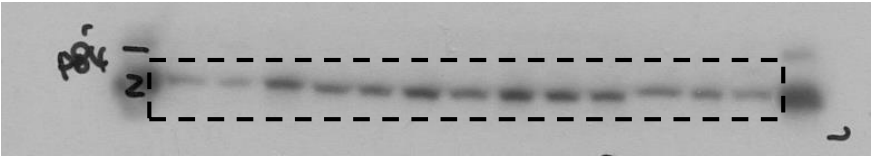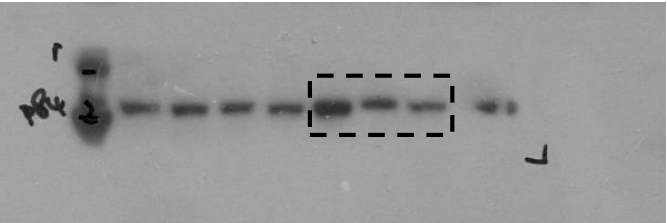

Cell lines:

- 1. EC1
- 2. HKESC2
- 3. T.Tn
- 4. SLMT
- 5. 81T
- 6. KYSE30
- 7. KYSE70TS
- 8. KYSE140
- 9. KYSE150
- 10. KYSE180TS
- 11. KYSE270
- 12. KYSE410
- 13. KYSE450
- 14. KYSE510
- 15. KYSE520
- 16. NE1

Figure S1b.

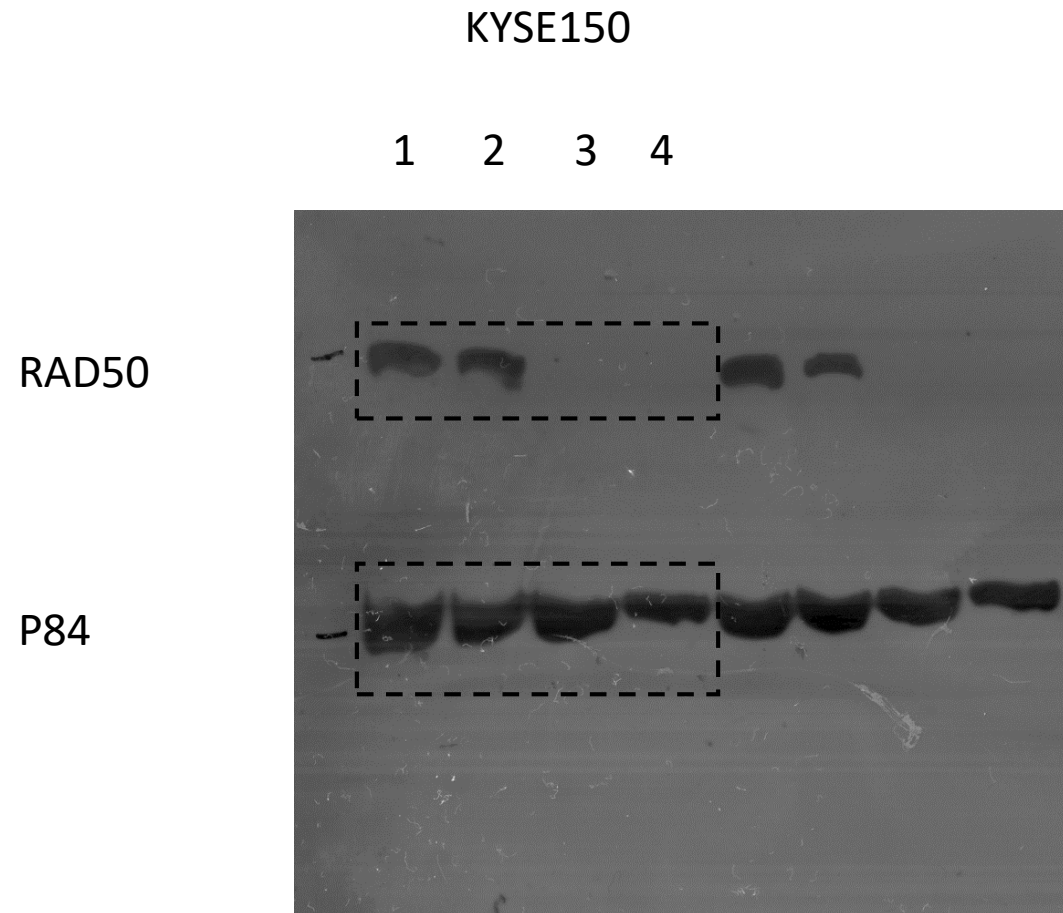

1: LacZ Control. 2: Scramble Control. 3: sgRAD50 ex10. 4: sgRAD50 ex2

Figure S1c.

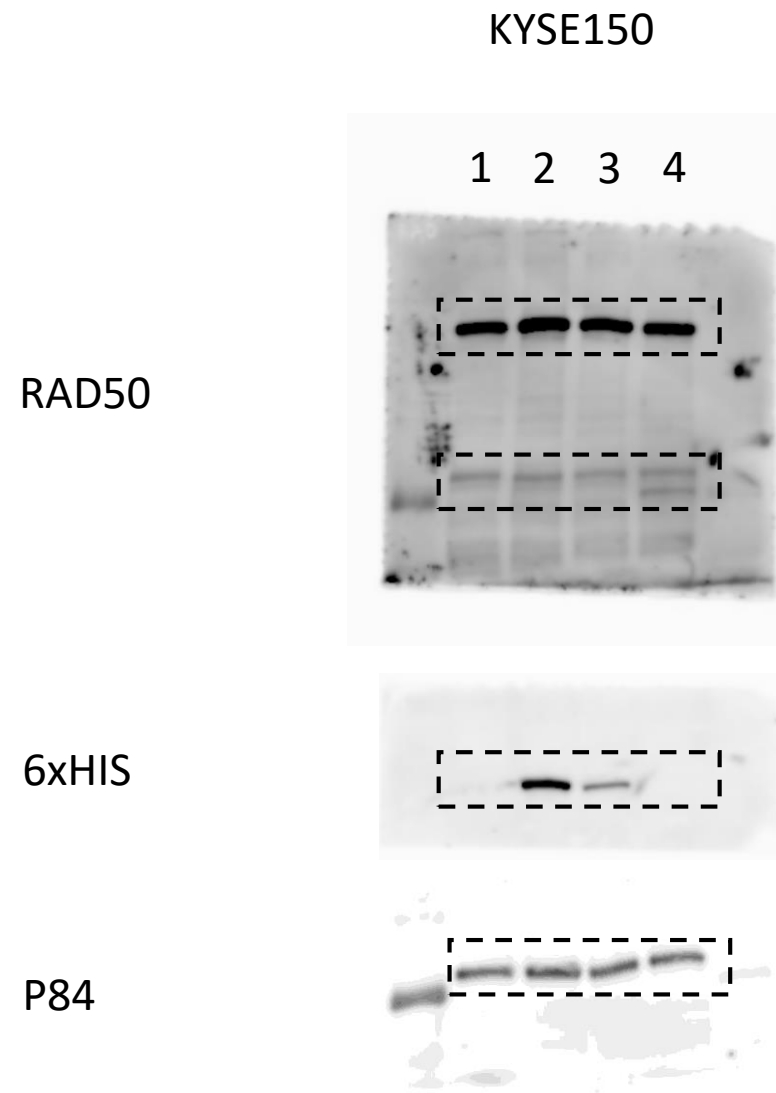

1: Vector-alone control. 2: RAD50-Wildtype. 3 RAD50-L1264F. 4. RAD50-Q672X

Figure S1c.

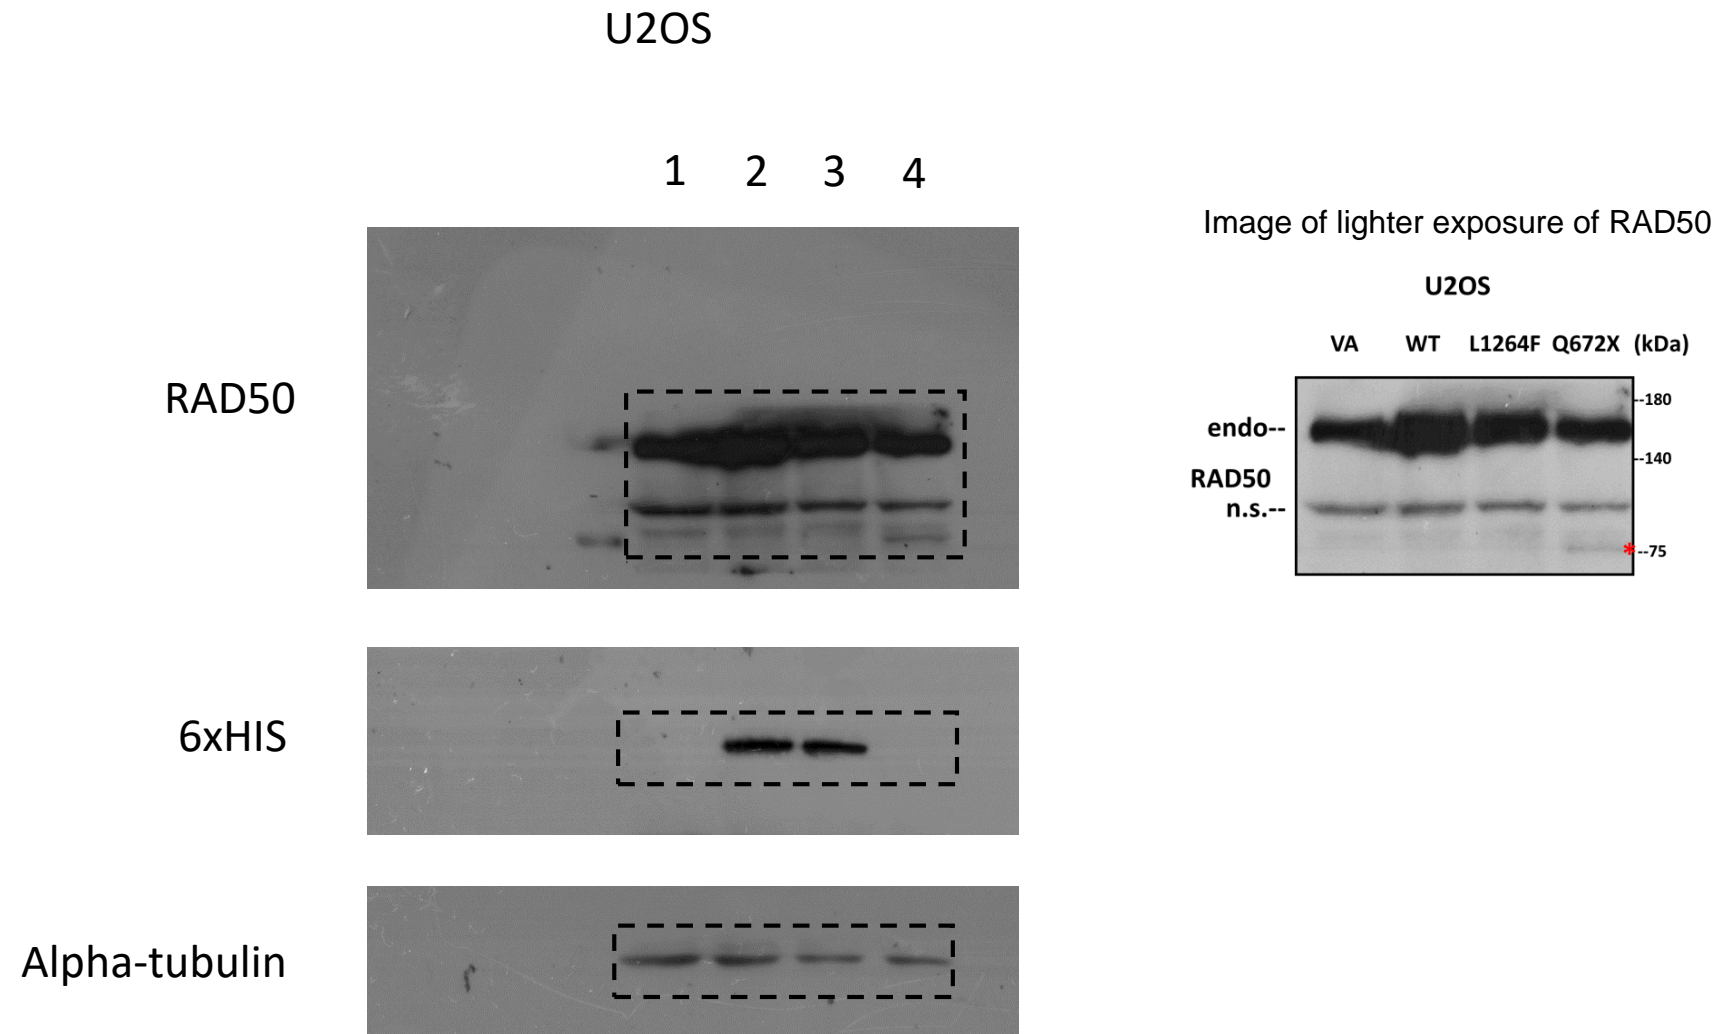

1: Vector-alone control. 2: RAD50-Wildtype. 3: RAD50-L1264F. 4: RAD50-Q672X

Note: U2OS samples in Figure 3c and 3d belongs to the same lysate samples run on the same SDS—PAGE gel, hence shared same loading control (Alpha-tubulin)

Figure S1d.

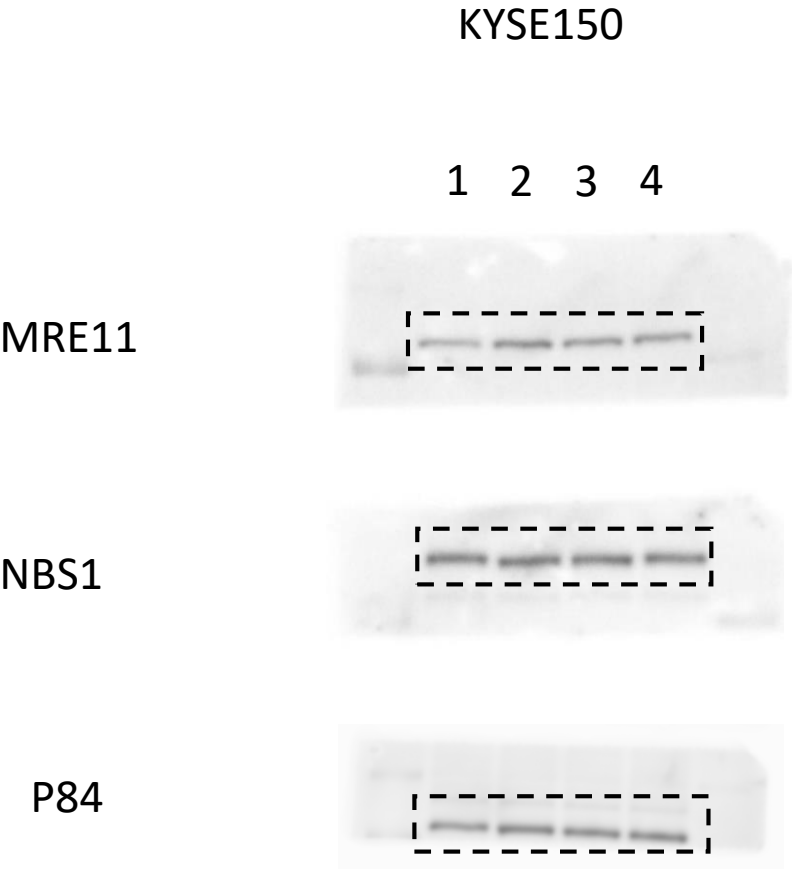

1: Vector-alone control. 2: RAD50-Wildtype. 3 RAD50-L1264F. 4. RAD50-Q672X

Figure S1d.

U2OS

MRE11

NBS1

Alpha-tubulin

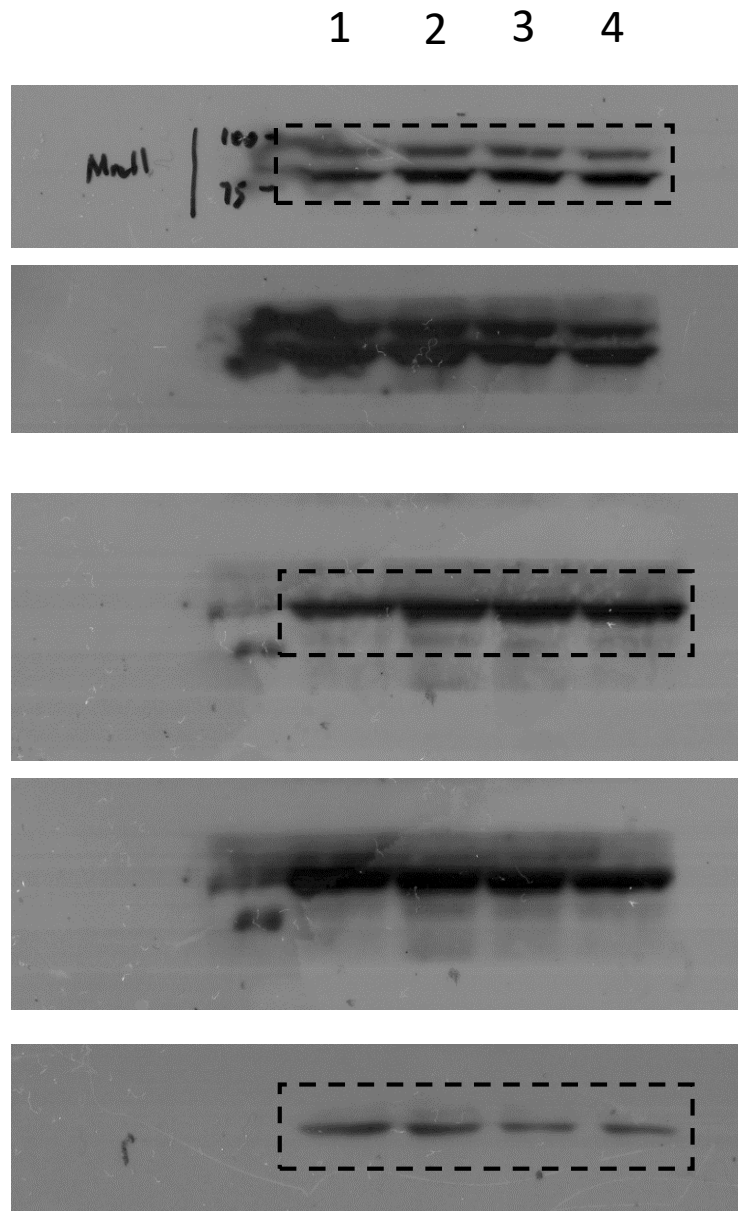

1: Vector-alone control. 2: RAD50-Wildtype. 3: RAD50-L1264F. 4: RAD50-Q672X

Note: U2OS samples in Figure 3c and 3d belongs to the same lysate samples run on the same SDS—PAGE gel, hence shared same loading control (Alpha-tubulin)
